# Supplementary material
Source: Springer Nature journal article supplement (https://www.springermedizin.de/resource/supplementary/12935_2010_247_MOESM3_ESM.pdf/9540138)

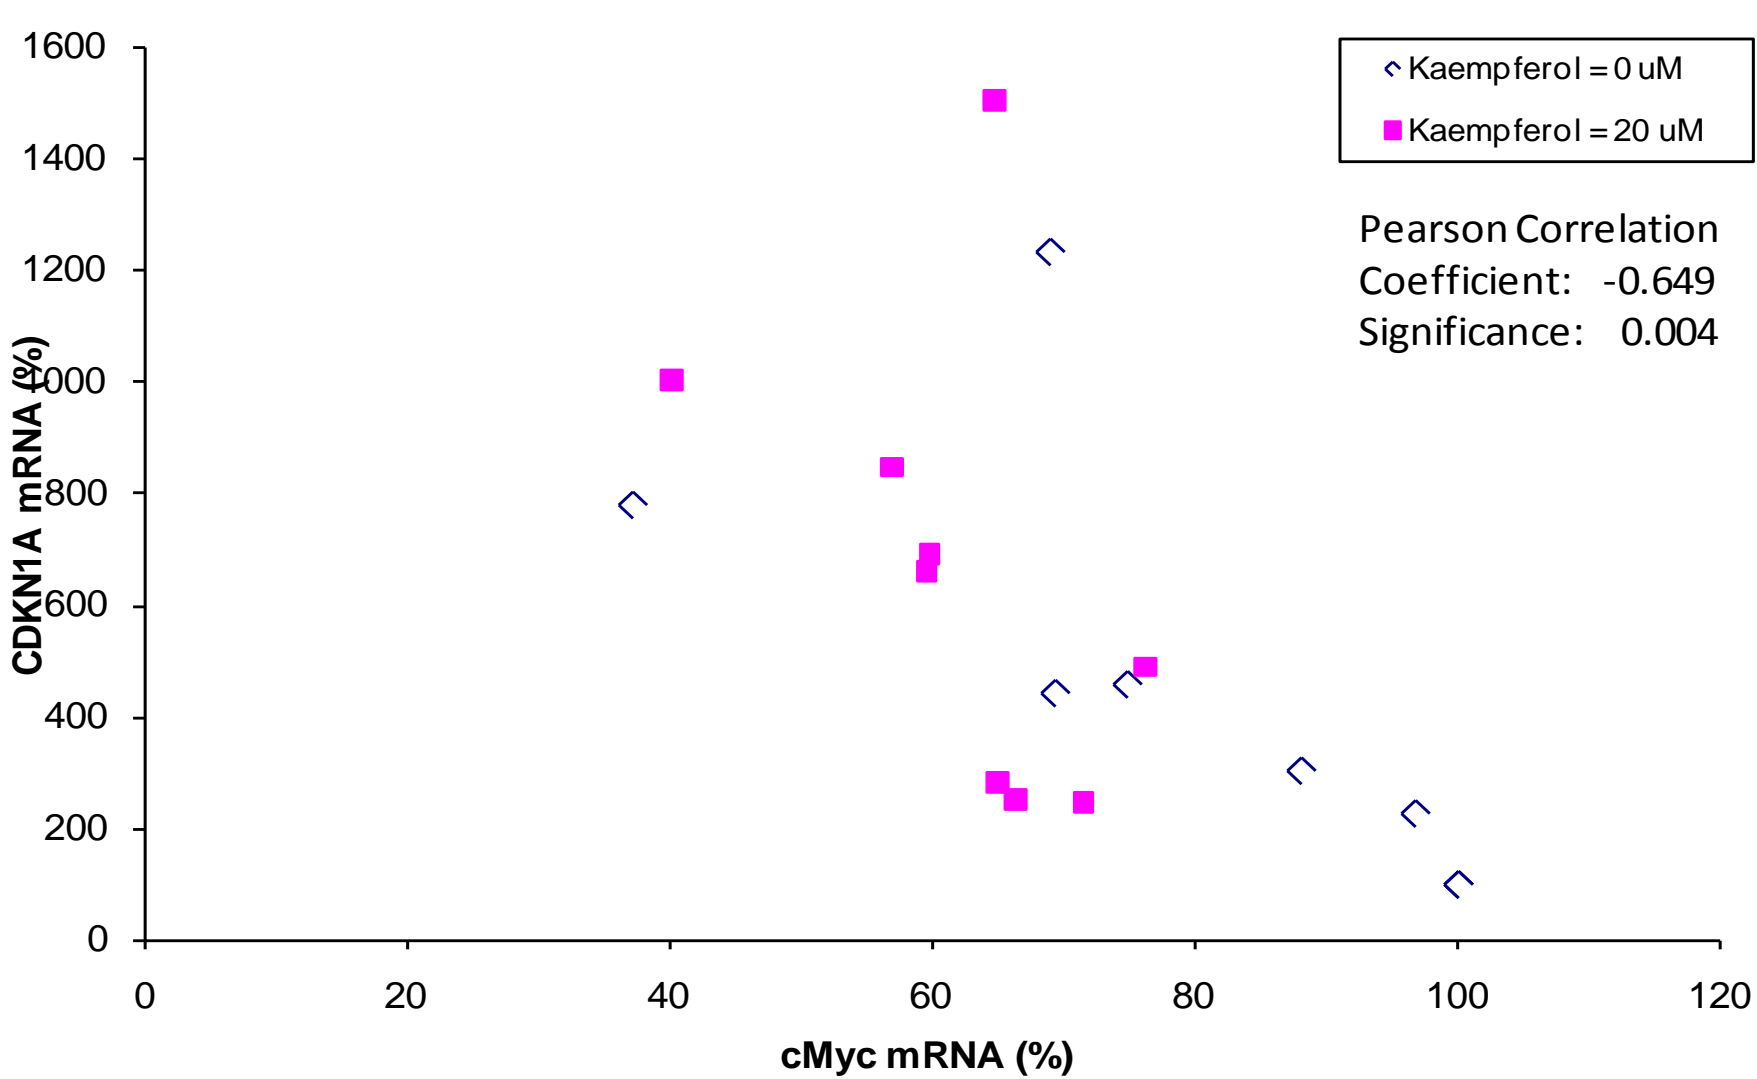

Supplement: MOESM3 [file 9540138]
